# Supplementary material for: PTENβ is an alternatively translated isoform of PTEN that regulates rDNA transcription
Source: PubMed Central journal article supplement (PMC5376652; doi:10.1038/ncomms14771), 2017-03-23
Supplement: ncomms14771-s1.pdf [file ncomms14771-s1.pdf]

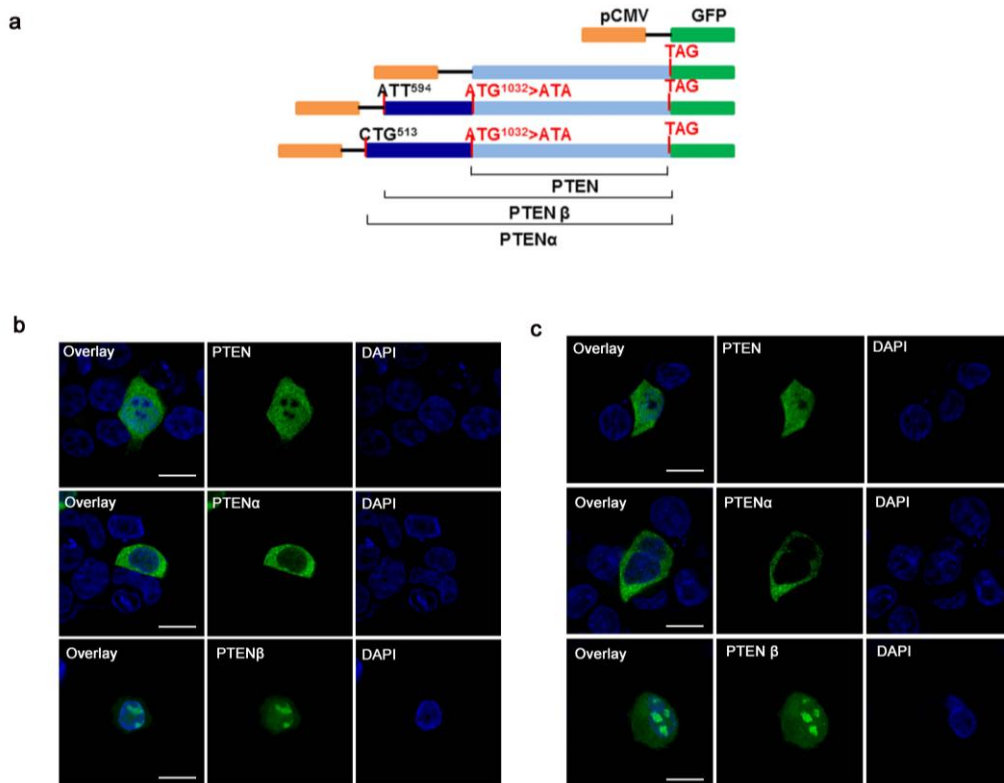

**Supplementary Figure 1. Validation of the subcellular localization of PTEN $\beta$  in the nucleolus.**

**(a)** Differing sets of PTEN, PTEN $\alpha$  and PTEN $\beta$  constructs. A TAG triplet was inserted in the C-terminus of PTEN, PTEN $\alpha$  and PTEN $\beta$  sequences in constructs as indicated in Figure 4a, in order to abolish expression of GFP tag.

**(b,c)** Subcellular localization of exogenous PTEN $\alpha$ , PTEN $\beta$  or PTEN without tag. Constructs in **(a)** were introduced into HeLa PTEN null cells. Twenty-four hours after transfection, cells were stained with DAPI and a PTEN antibody (ABM-2502) **(b)** or PTEN antibody (sc-7974) **(c)**, followed by imaging with confocal microscopy. The scale bars represent 10 $\mu$ m.

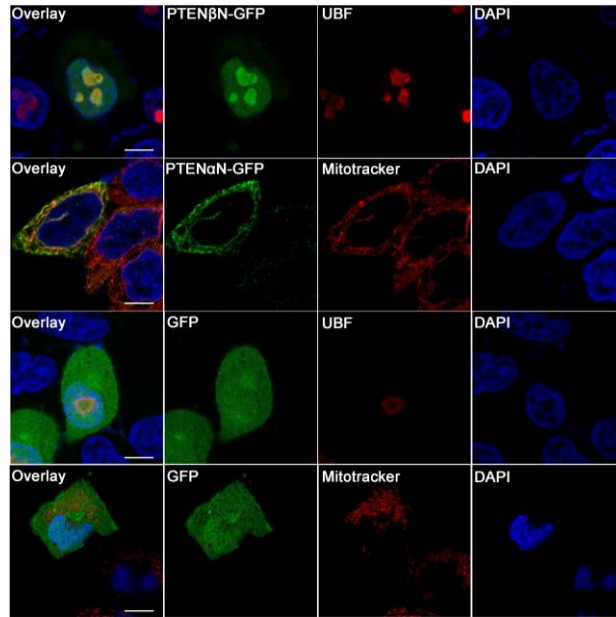

**Supplementary Figure 2. The N-terminal extended sequences are solely responsible for localization of PTEN $\alpha$  on mitochondria and accumulation of PTEN $\beta$  in the nucleolus.**

Plasmids expressing N-terminal extended sequences of PTEN $\alpha$  (AA 1-173) and PTEN $\beta$  (AA 1-146) were constructed with a C-terminal GFP tag. The indicated plasmids were introduced into HeLa PTEN null cells, followed by imaging with confocal microscopy. UBF was used as a nucleolar marker and MitoTracker was used to label mitochondria. GFP tagged mock plasmids were transfected as a negative control. The scale bars represent 5 $\mu$ m.

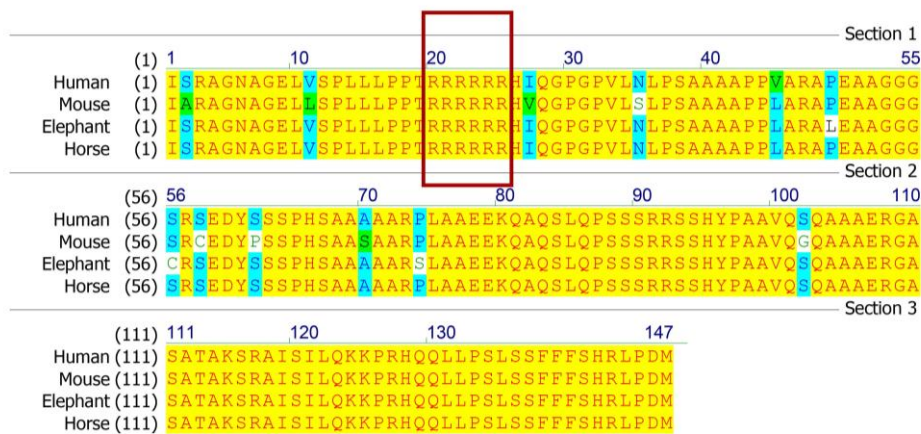

**Supplementary Figure 3. PTEN $\beta$  is evolutionarily conserved.**

Clustal-W alignment of the N-terminal extended sequence of Human PTEN $\beta$  with the genomic sequence from Mouse (Mouse Dec. 2011(GRCm38/mm10)), Elephant (Elephant Jul. 2009 (Broad/loxAfr3)) and Horse (Sept 2007(Broad/equCab2)) obtained from the UCSC genome browser (<http://genome.ucsc.edu/>). The conserved sequences are highlighted in yellow. The poly-arginine sequence in the N-terminal extended domain of PTEN $\beta$  is highlighted in the red box.

a

| Accession | Gene   | Function                                                     |
|-----------|--------|--------------------------------------------------------------|
| O43660    | PLRG1  | mRNA splicing, via spliceosome                               |
| P52597    | HNRNPF | nucleotide binding                                           |
| Q9Y2X3    | NOP58  | biogenesis of box C/D snoRNAs such as U3, U8 and U14 snoRNAs |
| O00567    | NOP56  | biogenesis of box C/D snoRNAs such as U3, U8 and U14 snoRNAs |
| P19338    | NCL    | pre-rRNA transcription and ribosome assembly                 |
| O15160    | POLR1C | synthesize ribosomal RNA precursors                          |
| Q9Y250    | POLR1D | synthesize ribosomal RNA precursors                          |
| F2Z3C0    | RPS9   | structural constituent of ribosome                           |
| M0R3D6    | RPL18A | structural constituent of ribosome                           |
| G5E9W7    | MRPS22 | Ribonucleoprotein, Ribosomal protein                         |
| Q5JR95    | RPS8   | structural constituent of ribosome                           |

b

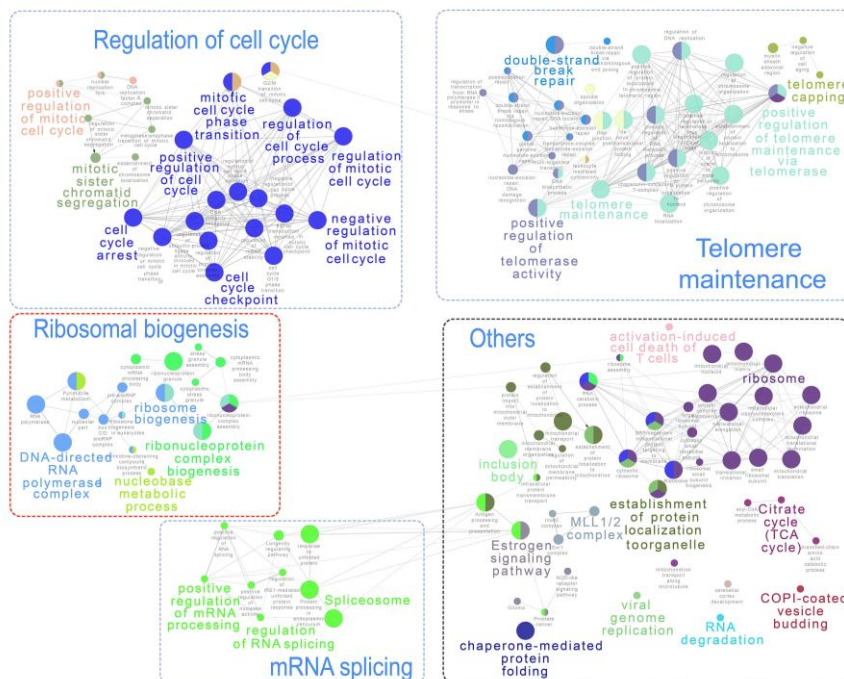

**Supplementary Figure 4. Various potential PTEN $\beta$  interacting nucleolar proteins identified by mass spectrometry analysis.**

(a) Identification of nucleolar proteins that may interact with PTEN $\beta$  by mass spectrometry analysis. Nucleolar proteins pull-down by PTEN $\beta$  which are more than 3 times as abundant as PTEN and PTEN $\alpha$  control groups are listed.

(b) Functionally grouped KEGG and GO Biological Process and Cellular Component term annotation network of PTEN $\beta$  pull-down genes. The nodes represent enriched terms, and node size indicates term enrichment significance after

Benjamini-Hochberg correction. The edges between two nodes represent initial genes shared between two enriched GO terms, and the thickness of the edges is based on their kappa scores. The calculated kappa score is also used for defining functional groups, which are displayed as nodes of the same color. The enriched terms of greatest interest are shown in bold face. The terms related to ribosomal biogenesis are highlighted in the red box. The terms related to additional ribosomal functions, such as the processing of mRNA, regulation of telomerase activity and regulation of the cell cycle are highlighted in blue boxes. The other terms are highlighted in the black box.

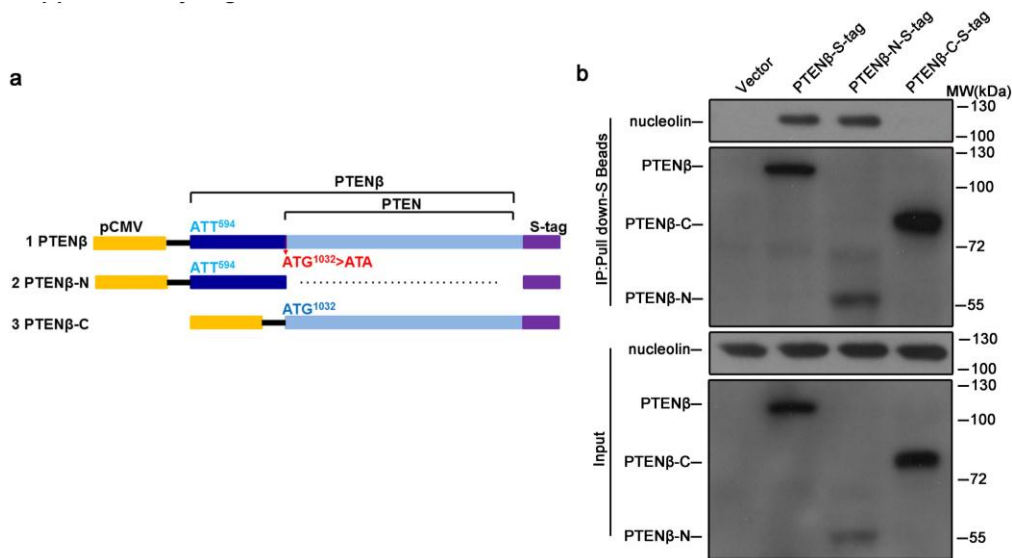

**Supplementary Figure 5. The N-terminal domain of PTEN $\beta$  is essential for its interaction with nucleolin.**

**(a)** A set of full length or truncated PTEN $\beta$  constructs with a C-terminal GFP tag. The AUG start codon of canonical PTEN was mutated to AUA in full length PTEN $\beta$  constructs in order to abolish expression of canonical PTEN.

**(b)** The constructs indicated in **(a)** were introduced into HEK 293T cells, followed by immunoprecipitation with GFP antibody, followed by western blotting with an anti-nucleolin antibody.

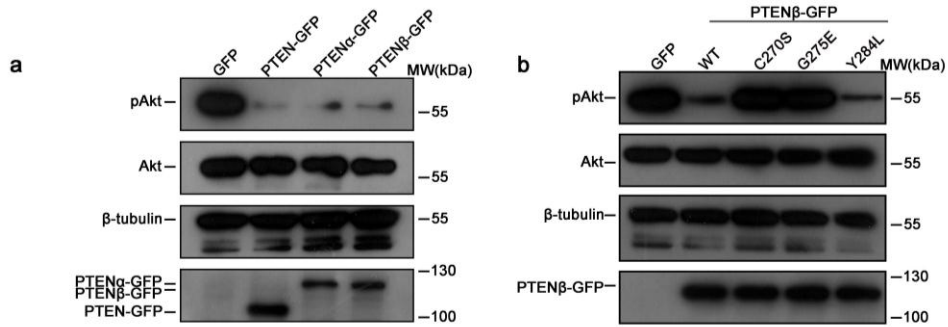

**Supplementary Figure 6. PTEN $\beta$ , like canonical PTEN, acts as an antagonist of the PI3K pathway.**

**(a)** C-terminal GFP tagged PTEN, PTEN $\alpha$  or PTEN $\beta$  were separately introduced into 786-O cells (no endogenous PTEN expression) followed by immunoblotting with p-AKT, AKT, or GFP antibody.

**(b)** C-terminal GFP tagged wild type PTEN $\beta$ , PTEN $\beta$  with lipid phosphatase activity abolished (G275E, analogous to PTEN (G129E)), PTEN $\beta$  with protein phosphatase activity abolished (Y284L, analogous to PTEN (Y138L)) and PTEN $\beta$  with both lipid and protein phosphatase activity abolished (C270S, analogous to PTEN (C124S)) were introduced separately into 786-O cells, followed by immunoblotting with p-AKT, AKT, or GFP antibodies.

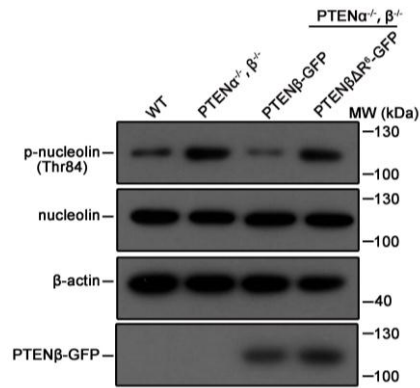

**Supplementary Figure 7. The nucleolin phosphatase activity of PTEN $\beta$  is linked to its localization in the nucleolus.**

PTEN $\alpha$  and PTEN $\beta$  double knockout Hela cells were transfected with C-terminal GFP tagged PTEN $\beta$  or C-terminal GFP tagged PTEN $\beta\Delta R^6$ , followed by immunoblotting with p-nucleolin (Thr 84), nucleolin, or GFP antibody.



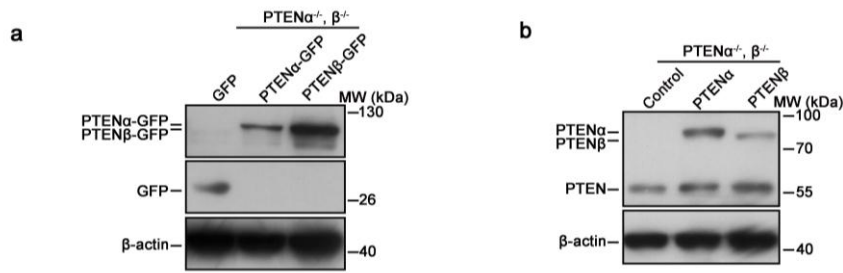

**Supplementary Figure 8. Determination of transfection efficiency.**

**(a)** C-terminal GFP tagged PTEN $\alpha$  and PTEN $\beta$  were introduced into PTEN $\alpha$  and PTEN $\beta$  double knockout cells, followed by immunoblotting with GFP antibody.  $\beta$ -actin was used as a control.

**(b)** Exogenous PTEN $\alpha$  and PTEN $\beta$  without a tag were introduced into PTEN $\alpha$  and PTEN $\beta$  double knockout cells, followed by immunoblotting with a PTEN monoclonal antibody.  $\beta$ -actin was used as a control.

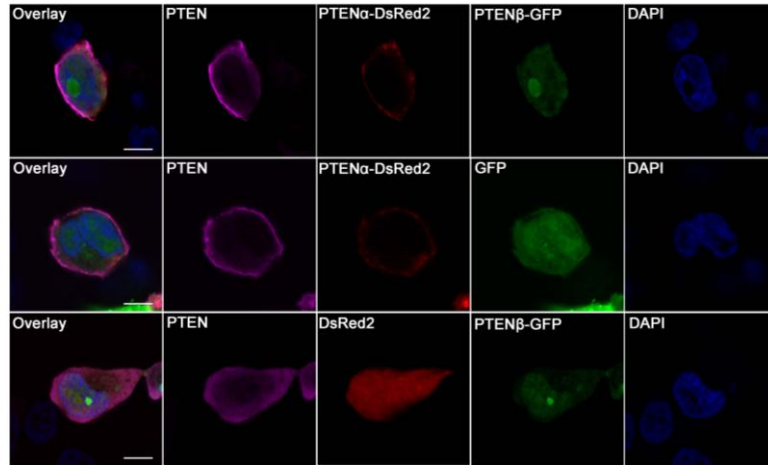

**Supplementary Figure 9. The majority PTEN isoforms show mutually exclusive localization.**

Plasmids expressing C-terminal DsRed2 tagged PTEN $\alpha$ , C-terminal GFP tagged PTEN $\beta$  and C-terminal FLAG tagged PTEN were constructed and co-transfected in HeLa PTEN null cells. A monoclonal FLAG antibody (Sigma-Aldrich, F3165) was used to label PTEN. Empty PEGFP-N1 and pDsRed2-N1 plasmids were transfected as controls. The scale bars represent 5 $\mu$ m.

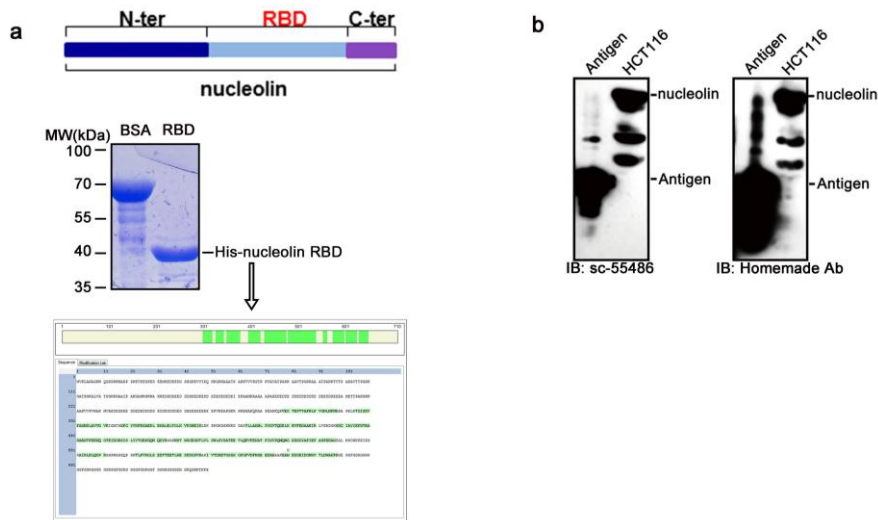

**Supplementary Figure 10. Polyclonal anti-nucleolin antibody raised in our laboratory.**

(a) The RNA binding domain of nucleolin (RBD) was cloned into the pET28a plasmid (upper panel) for protein purification and antibody generation. Purified His-RBD is shown in a SDS-PAGE gel (lower panel). Mass spectrometry analysis confirmed the peptide sequence of nucleolin.

(b) Verification of antibody specificity. Western blot analysis in HCT116 cells with nucleolin antibody established in our laboratory as indicated in (a), or with a commercial antibody (sc-55486).

**a**

```
LERGGEAAAAAAAAAAPGRGSESPVTMSRAGNAGELVSPLLLPTRRRRRRHIQGGPVPV
LNLPSAAAAPPVARAPEAAGGSRSEYSSSPHSAAAAARPLAAEEKQAQSLQPSSSRRS
SHYPAAVQSQAAAERGASATAKSRAISILQKKPRHQLLPSLSFFFSHRLPDMTAIIKE
IVSRNKRRYQEDGFDLDLTYIYPNIIAMGFPAERLEGVYRNNIDDVVRFLDSKHKNHYKI
YNLCAERHYDTAKFNCRVAQYPFEDHNPPQLELIKPFCEDLDQWLSEDDNHVAAIHCKAG
KGRTGVMICAYLLHRGKFLKAQEALDFYGEVTRDRKKGVTIPSQRRYVYYSYLLKNHLD
YRPVALLFHKMMFETIPMFSGGTCNPQFVVCQLKVKIYSSNSGPTRREDKFMYFEFPQPL
PVCGDIKVEFFHKQNKMLKKDKMFHVWNTFFIPGPEETSEKVENGSLCDQEIDSICSIE
RADNDKEYLVLTLTKNDLDKKANKDKANRYFSPNFKVKLYFTKTVEEPSNPEASSSTSVTP
DVSDNEPDHYRYSDTTSDPENEPFDEDQHTQITKV
```

Human

**b**

```
LERGGEAAAAAAAAAPGRGSESPVTMARAGNAGELLSPLLLLPTRRRRRRHVQGGPVLSPSA
AAAPLARAPEAAGGSRCEDYSSSPHSAASAARPLAAEEKQAQSLQPSSSRSSHYPAAVQ
GQAAAERGASATAKSRAISILQKKPRHQLLPSLSFFFSHRLPDMTAIIKEIVSRNKRRYQ
EDGFDLDLTYIYPNIIAMGFPAERLEGVYRNNIDDVVRFLDSKHKNHYKIYNLCAERHYDTA
KFNCRVAQYPFEDHNPPQLELIKPFCEDLDQWLSEDDNHVAAIHCKAGKGRTGVMICAYLLH
RGKFLKAQEALDFYGEVTRDRKKGVTIPSQRRYVYYSYLLKNHLDYRPVALLFHKMMFETI
PMFSGGTCNPQFVVCQLKVKIYSSNSGPTRREDKFMYFEFPQPLPVCGDIKVEFFHKQNKML
KKDKMFHVWNTFFIPGPEETSEKVENGSLCDQEIDSICSIERADNDKEYLVLTLTKNDLDK
ANKDKANRYFSPNFKVKLYFTKTVEEPSNPEASSSTSVTPDVSDNEPDHYRYSDTTSDPEN
EPFDEDQHSQITKV
```

Mouse

### Supplementary Figure 11. Sequences supplemented in the UniProt database.

(a,b) N-terminal extended PTEN sequence supplemented in the UniProt Human database (a) or in the UniProt Mouse database (b) for raw file searching by Proteome Discoverer. The most proximal N-terminal amino acids of PTEN $\alpha$  or PTEN $\beta$  are highlighted separately in green or red.

Figure 1

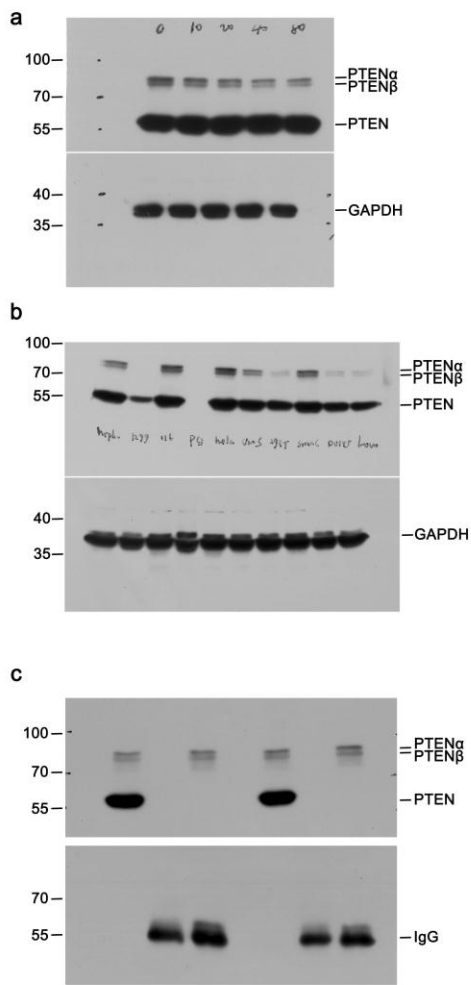

Figure 2

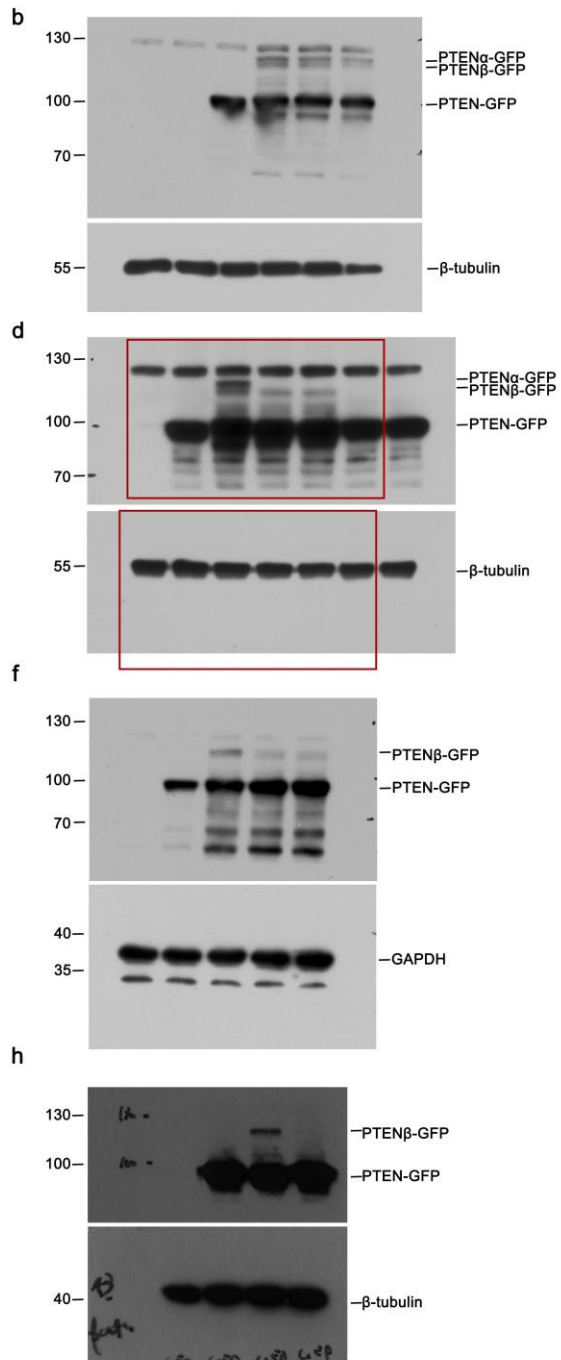

Supplementary Figure 12. Original immunoblots for indicated figures.

Figure 3

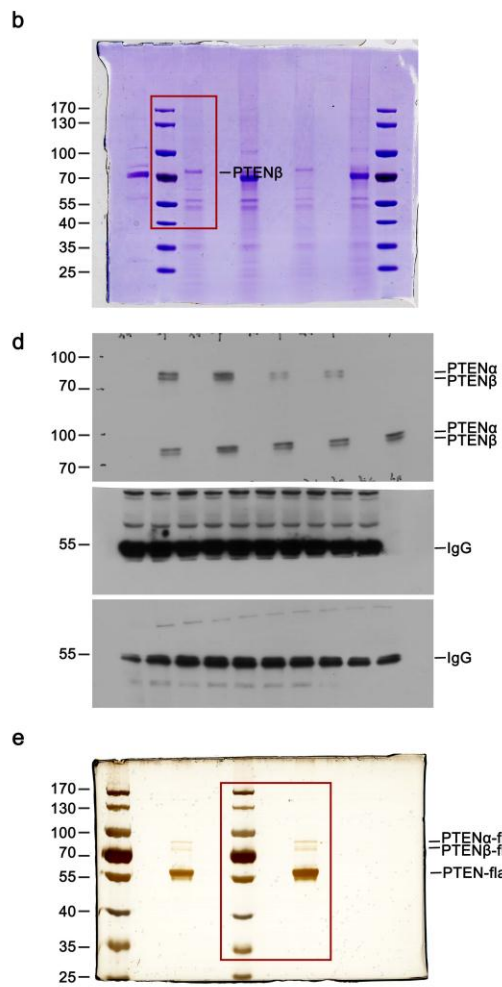

Figure 4

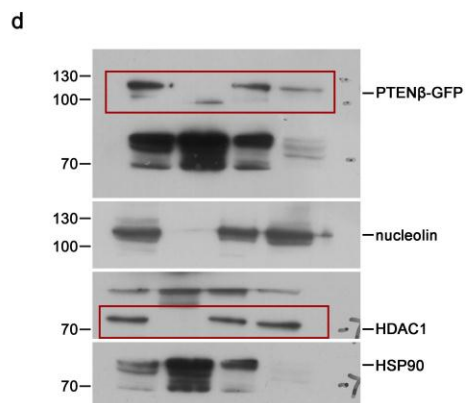

Figure 5

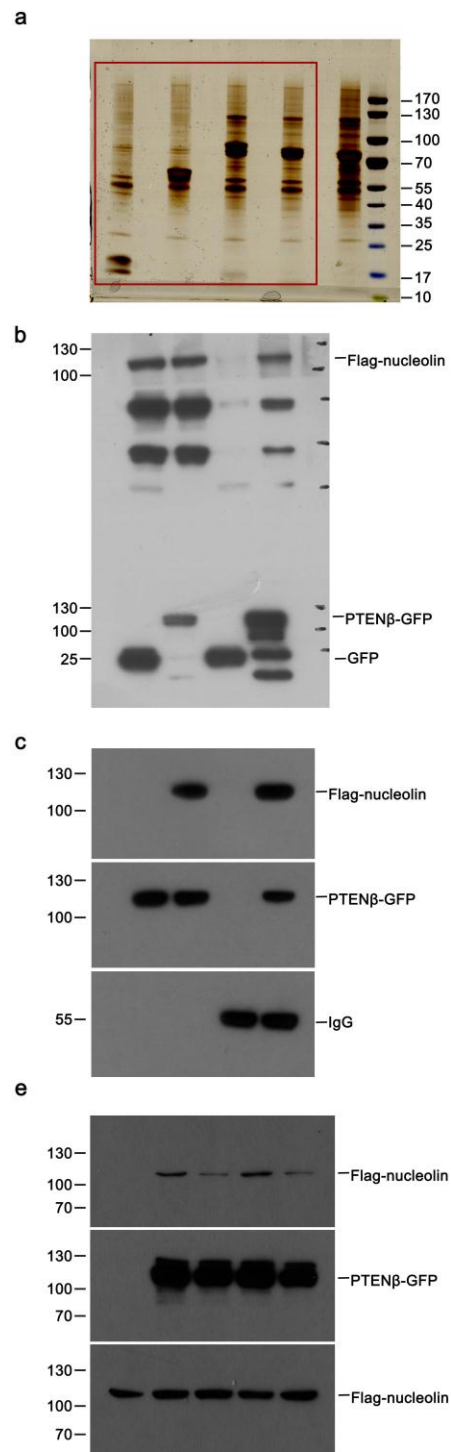

Supplementary Figure 13. Original immunoblots and polyacrylamide gels for indicated figures.

Figure 5

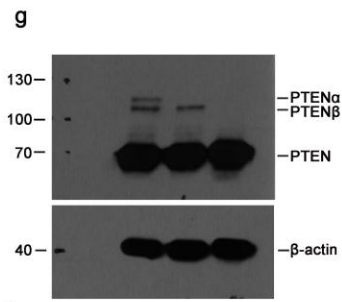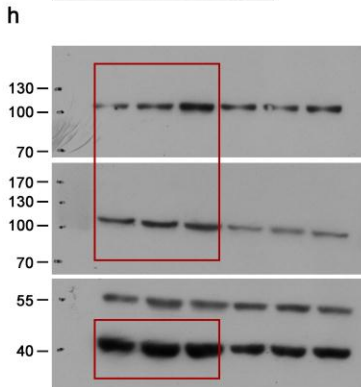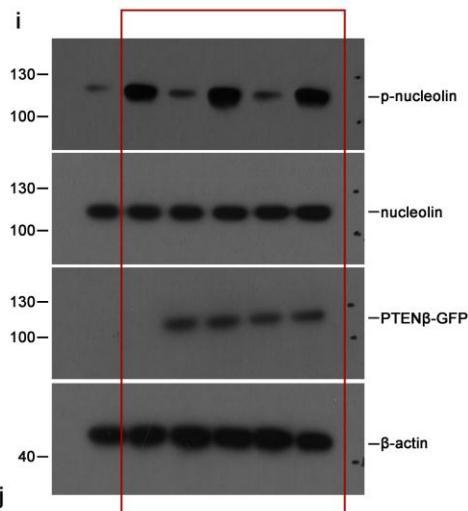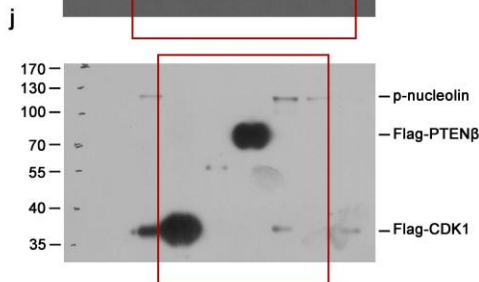

Figure 6

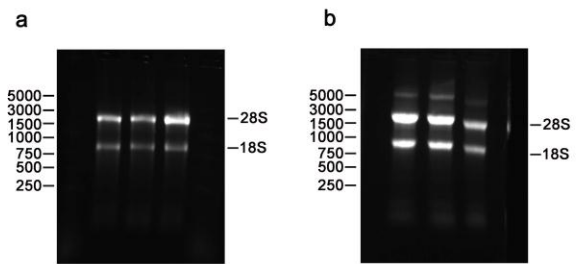

Supplementary Figure 5

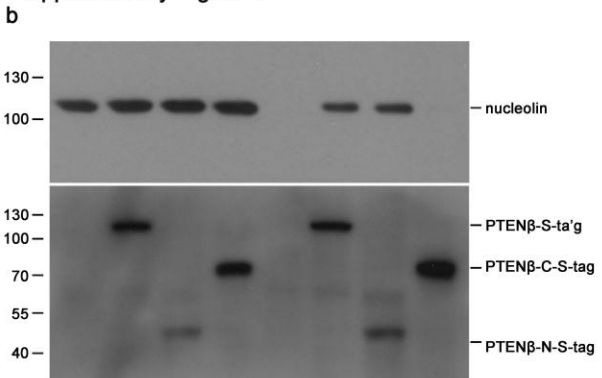

Supplementary Figure 6

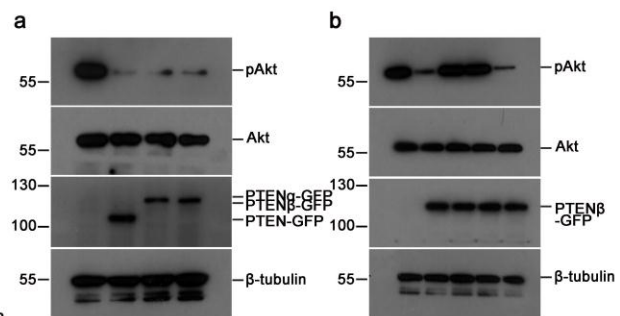

Supplementary Figure 7

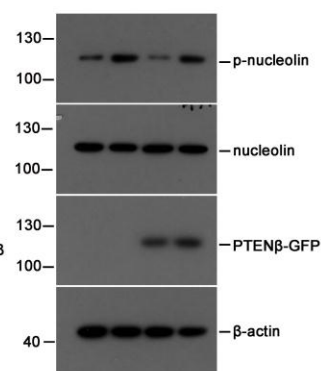

Supplementary Figure 14. Original immunoblots and agarose gels for indicated figures.

Supplementary Figure 8

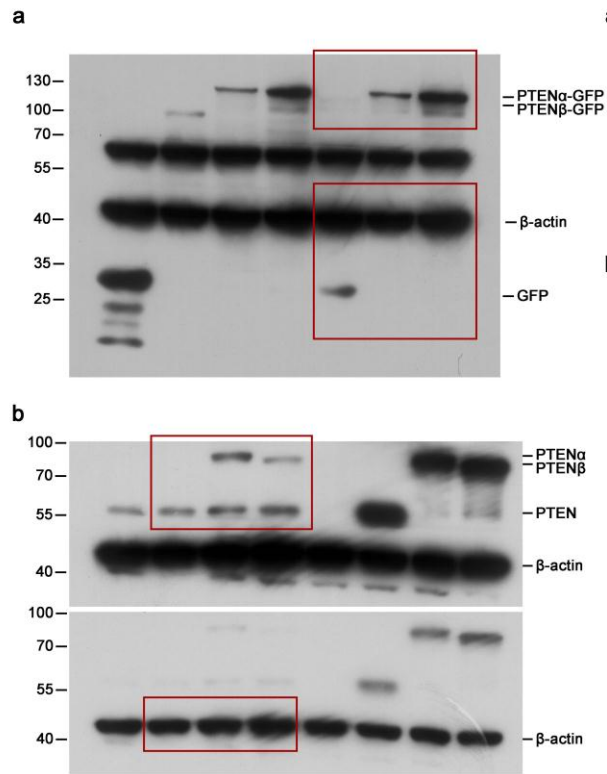

Supplementary Figure 10

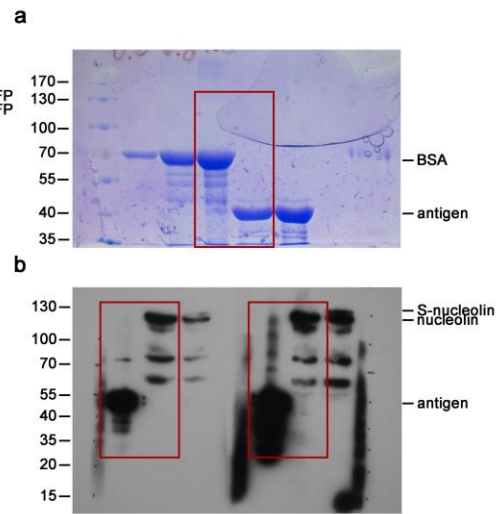

Supplementary Figure 15. Original immunoblots and polyacrylamide gels for indicated figures.



**Supplementary Table 1. A list of antibodies used in this study**

| Species           | Antigen                 | Clone#  | Company (Cat#)           | Dilution ratio  |                      |                     | Citation |
|-------------------|-------------------------|---------|--------------------------|-----------------|----------------------|---------------------|----------|
|                   |                         |         |                          | Immuno blotting | Immuno precipitation | Immuno fluorescence |          |
| Mouse monoclonal  | PTEN                    | A2B1    | Santa Cruz (sc-7974)     | 1:1000          |                      | 1:200               | 1        |
| Rabbit monoclonal | PTEN                    | 138G6   | Cell Signaling (#9559)   | 1:1000          |                      |                     | 2        |
| Mouse monoclonal  | PTEN                    | 6H2.1   | ABM (#2502)              |                 |                      | 1:200               | 3        |
| Rabbit polyclonal | GFP                     |         | MBL (#598)               | 1:5000          | 1:500                |                     | 4        |
| Rabbit polyclonal | AKT                     |         | Cell Signaling (#9272)   | 1:1000          |                      |                     | 5        |
| Rabbit polyclonal | AKT Phospho (T473)      |         | Cell Signaling (#9271)   | 1:1000          |                      |                     | 5        |
| Rabbit monoclonal | nucleolin Phospho (T84) | EPR8080 | Abcam (ab155977)         | 1:2000          |                      |                     | N/A      |
| Mouse monoclonal  | UBF                     | F-9     | Santa Cruz (sc-13125)    |                 |                      | 1:200               | 6        |
| Rabbit polyclonal | $\beta$ -actin          |         | MBL (pm053)              | 1:5000          |                      |                     | 7        |
| Mouse monoclonal  | GAPDH                   | 1C4     | Sungene Biotech (KM9002) | 1:5000          |                      |                     | N/A      |
| Mouse monoclonal  | FLAG                    | M2      | Sigma-Aldrich (F3165)    | 1:5000          | 1:500                | 1:300               | 8        |
| Mouse monoclonal  | $\beta$ -tubulin        | 3G7     | Sungene Biotech (KM9003) | 1:5000          |                      |                     | N/A      |
| Mouse polyclonal  | PTEN $\alpha$           |         | Homemade                 |                 | 1:500                |                     | 9        |
| Rabbit polyclonal | nucleolin               |         | Homemade                 | 1:2000          |                      |                     |          |

**Supplementary Table 2. Primers for constructing plasmids**

| <b>Vector</b>        | <b>Forward primer (5'-3')</b>      | <b>Backward primer (5'-3')</b>         |
|----------------------|------------------------------------|----------------------------------------|
| PTEN-GFP             | CCGGAATTCATGACAGCCATCAT<br>CAAAGAG | CGCGGATCCGCGACTTTTGTAAATT<br>TGTGTATGC |
| PTEN $\alpha$ -GFP   | CCGGAATTCCTGGAGCGGGGGG<br>GAGAAG   | CGCGGATCCGCGACTTTTGTAAATT<br>TGTGTATGC |
| PTEN $\beta$ -GFP    | CCGGAATTCATTTCCAGGGCTGG<br>GAACG   | CGCGGATCCGCGACTTTTGTAAATT<br>TGTGTATGC |
| PTEN-S-tag           | CCGGAATTCATGACAGCCATCAT<br>CAAAGAG | CGCGGATCCGACTTTTGTAAATTTG<br>TGTATGC   |
| PTEN $\alpha$ -S-tag | CCGGAATTCCTGGAGCGGGGGG<br>GAGAAG   | CGCGGATCCGACTTTTGTAAATTTG<br>TGTATGC   |
| PTEN $\beta$ -S-tag  | CCGGAATTCATTTCCAGGGCTGG<br>GAACG   | CGCGGATCCGACTTTTGTAAATTTG<br>TGTATGC   |
| PTEN $\alpha$ -His   | CCGGAATTCCTGGAGCGGGGGG<br>GAGAAG   | CGCGGATCCGACTTTTGTAAATTTG<br>TGTATGC   |
| FLAG-nucleolin       | CGCGGATCCATGGTGAAGCTCG<br>CGAAGGC  | CCGGAATTCCTATTCAAACCTTCGT<br>CTTC      |

**Supplementary Table 3. Primers for mutagenesis**

| <b>Vector</b>                                                       | <b>Forward primer (5'-3')</b>           | <b>Backward primer (5'-3')</b>           |
|---------------------------------------------------------------------|-----------------------------------------|------------------------------------------|
| PTEN $\alpha$ CTG <sup>513</sup> >CTC                               | CGGCACCTCCCGCTCCTC<br>GAGCGGGGGGAGAAG   | CTTCTCCCCCGCTCGAG<br>GAGCGGGAGGTGCCG     |
| PTEN $\alpha$ ATT <sup>594</sup> >CTC                               | GAGTCGCCTGTCACCCTC<br>TCCAGGGCTGGGAAC   | GTTCCCAGCCCTGGAGAGG<br>GTGACAGGCGACTC    |
| PTEN $\alpha$ TTG <sup>621</sup> >CTC                               | GGGAACGCCGAGAGCTC<br>GTCTCTCCCCTTCTA    | TAGAAGGGGAGAGACGAG<br>CTCTCCGCGGTTCCC    |
| PTEN $\alpha$ ATG <sup>1032</sup> >ATA                              | CACAGGCTCCAGACATA<br>ACAGCCATCATCAAAG   | CTTTGATGATGGCTGTTAT<br>GTCTGGGAGCCTGTG   |
| PTEN $\beta$ ACC <sup>591</sup> deletion                            | TCTGAGTCGCCTGTCATTT<br>CCAGGGCTTAG      | CTAAGCCCTGGAAATGACA<br>GGCGACTCAGA       |
| PTEN $\beta$ GTCACC <sup>588</sup><br>deletion                      | GGGTCTGAGTCGCCTATT<br>TCCAGGGCTGGG      | CCCAGCCCTGGAAATAGGC<br>GACTCAGACCC       |
| PTEN $\beta$ TGT <sup>372</sup> >TCT                                | TTGCAGCAATTCACTCTA<br>AAGCTGGAAGGGAC    | GTCCCTTCCAGCTTTAGA<br>GTGAATTGCTGCAA     |
| PTEN $\beta$ GGA <sup>387</sup> >GAA                                | GTAAAGCTGGAAGGAAC<br>GAACTGGTGTAAATG    | CATTACACCAGTTCGTTCT<br>TTCCAGCTTTAC      |
| PTEN $\beta$ TAT <sup>414</sup> >CTT                                | GTAATGATATGTGCACTT<br>TTATTACATCGGGGC   | GCCCCGATGTAATAAAAGT<br>GCACATATCATTAC    |
| PTEN $\beta$ ATT <sup>594</sup> downstream<br>palindrome disruption | GAACGCCGAGAAATGGT<br>CTCAGCCCTTCTACTGCC | GGCAGTAGAAGGGCTGAG<br>ACCAATTCTCCGCGCTTC |

**Supplementary Table 4. Primers for RT-PCR**

| <b>Target</b> | <b>Forward primer (5'-3')</b> | <b>Backward primer (5'-3')</b> |
|---------------|-------------------------------|--------------------------------|
| 45S pre-rRNA  | CCTGCTGTTCTCTCGCGCG<br>TCCGAG | AACGCCTGACACGCACGGC<br>ACGGAG  |

## Supplementary References

1. Zhang H, Zhou X, Xu C, Yang J, Xiang J, Tao M, *et al.* Synergistic tumor suppression by adenovirus-mediated ING4/PTEN double gene therapy for gastric cancer. *Cancer gene therapy* 2016, **23**(1): 13-23.
2. Wan X, Helman LJ. Levels of PTEN protein modulate Akt phosphorylation on serine 473, but not on threonine 308, in IGF-II-overexpressing rhabdomyosarcomas cells. *Oncogene* 2003, **22**(50): 8205-8211.
3. Kwak MK, Johnson DT, Zhu C, Lee SH, Ye DW, Luong R, *et al.* Conditional deletion of the Pten gene in the mouse prostate induces prostatic intraepithelial neoplasms at early ages but a slow progression to prostate tumors. *PLoS one* 2013, **8**(1): e53476.
4. Tsuruta F, Green EM, Rousset M, Dolmetsch RE. PIKfyve regulates CaV1.2 degradation and prevents excitotoxic cell death. *The Journal of cell biology* 2009, **187**(2): 279-294.
5. Franke TF, Kaplan DR, Cantley LC. PI3K: downstream AKTion blocks apoptosis. *Cell* 1997, **88**(4): 435-437.
6. Wandrey F, Montellese C, Koos K, Badertscher L, Bammert L, Cook AG, *et al.* The NF45/NF90 Heterodimer Contributes to the Biogenesis of 60S Ribosomal Subunits and Influences Nucleolar Morphology. *Molecular and cellular biology* 2015, **35**(20): 3491-3503.
7. Wang G, Li Y, Wang P, Liang H, Cui M, Zhu M, *et al.* PTEN regulates RPA1 and protects DNA replication forks. *Cell research* 2015, **25**(11): 1189-1204.
8. Gu X, Mao X, Lussier MP, Hutchison MA, Zhou L, Hamra FK, *et al.* GSG1L suppresses AMPA receptor-mediated synaptic transmission and uniquely modulates AMPA receptor kinetics in hippocampal neurons. *Nature communications* 2016, **7**: 10873.
9. Liang H, He S, Yang J, Jia X, Wang P, Chen X, *et al.* PTENalpha, a PTEN isoform translated through alternative initiation, regulates mitochondrial function and energy metabolism. *Cell metabolism* 2014, **19**(5): 836-848.
